# Supplementary material
Source: PubMed Central journal article supplement (PMC6204908)

## Supporting Information

### Figure S1

**PKG I $\alpha$  oxidation by ambient air.** Ambient air oxidation of reduced PKG I $\alpha$  was achieved through four rounds of buffer exchange into 50 mM MES, 150 mM NaCl, pH 6.9 to remove the TCEP. Oxidation was visualized by denaturing, non-reducing SDS-PAGE in the absence of maleimide. M - monomer, D - dimer, O - oligomer

### Figure S2

**Sequence alignment of mammalian PKG I $\alpha$  and I $\beta$  isoforms denoting the locations of cysteine residues confirmed to form disulfide bonds.** Sequence alignment colored by BLOSUM62 score denoting **A)** the placement of C42 within the dimerization domain and **B)** the location of C117 and C195 in relation to nearby structural features within the CNB A-site of PKG I $\alpha$ , including the A helix, the B/C helix, and the phosphate-binding cassette.

### Figure S3

**Oxidation-dependent activation of PKG I $\beta$ .** **A)** The cGMP-dependent activation of PKG I $\alpha$  (black) and I $\beta$  (yellow) under reducing (solid circles and line) and oxidizing (open circles and dashed line) conditions by an *in vitro* phosphotransferase assay. **B)** Non-reducing, denaturing SDS-PAGE of PKG I $\beta$  treated with increasing concentrations of H<sub>2</sub>O<sub>2</sub> (0-2 mM). The dashed line indicates the point at which the concentration of H<sub>2</sub>O<sub>2</sub> overcomes the concentration of TCEP in the buffer. H<sub>2</sub>O<sub>2</sub> values corrected for the presence of TCEP are shown in red. M - monomer, D - dimer

### Figure S4

**Comparison of median channel open times when exposed to PKG I $\alpha$  WT and C42S.** K<sub>Ca</sub>1.1 channel open dwell times corresponding to patches in **Figure 4** were analyzed using non-parametric Mann-Whitney statistics for conditions where patches were exposed to control (-kinase, -cGMP) or experimental (+kinase, +cGMP) conditions. Individual measurements (scatter) are shown overlaid with the mean  $\pm$  SEM are depicted for **Aa)** PKG I $\alpha$  WT (N=13) and **Ba)** PKG I $\alpha$  C42S (N=6). Channel open times were plotted as histograms for representative patches (0.1 ms bins) when exposed to **Ab)** PKG I $\alpha$  WT and **Bb)** PKG I $\alpha$  C42S (solid fill) in the presence of 5  $\mu$ M cGMP. Control conditions (dashed fill) in the absence of kinase and cGMP are also depicted. (n.s. - not significant, \* $p < 0.02$ )

### Figure S5

**Activity of K<sub>Ca</sub>1.1 treated with C42S (0 cGMP and ATP) by patch clamp in the inside-out configuration.** K<sub>Ca</sub>1.1 channel recordings under reducing conditions when exposed to PKG I $\alpha$  C42S in the absence of cGMP and ATP. Activity was measured using symmetrical K<sup>+</sup> at +40, 0, and -40 mV.



Figure S3

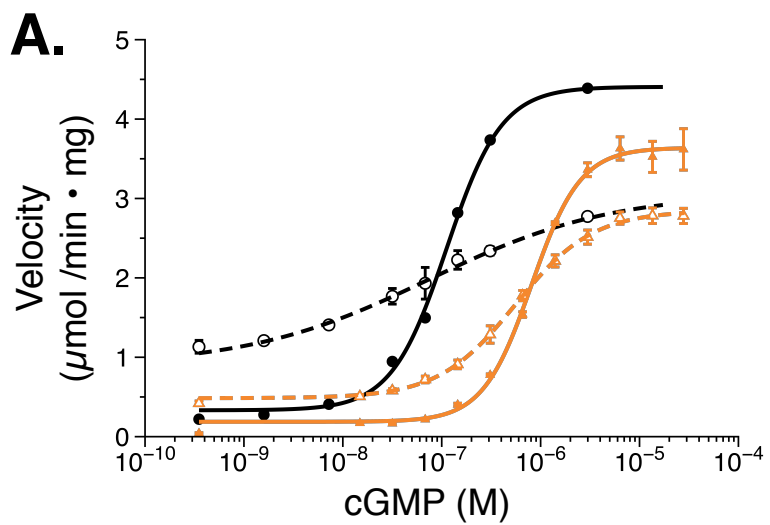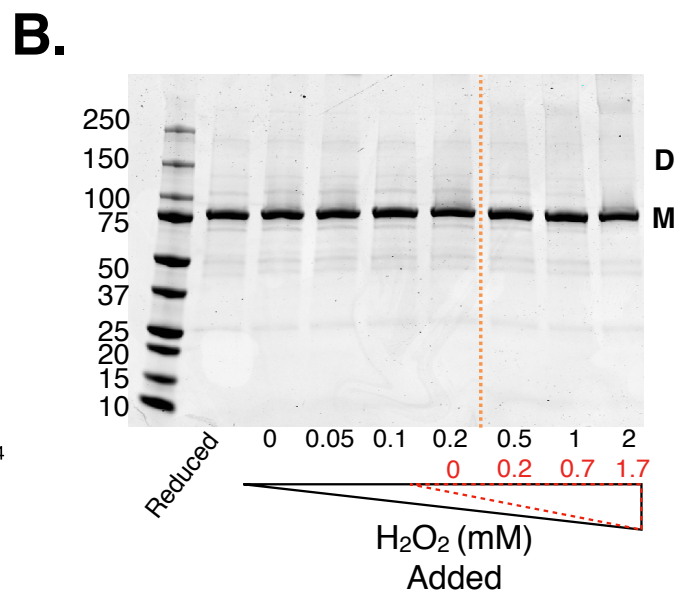

Figure S4

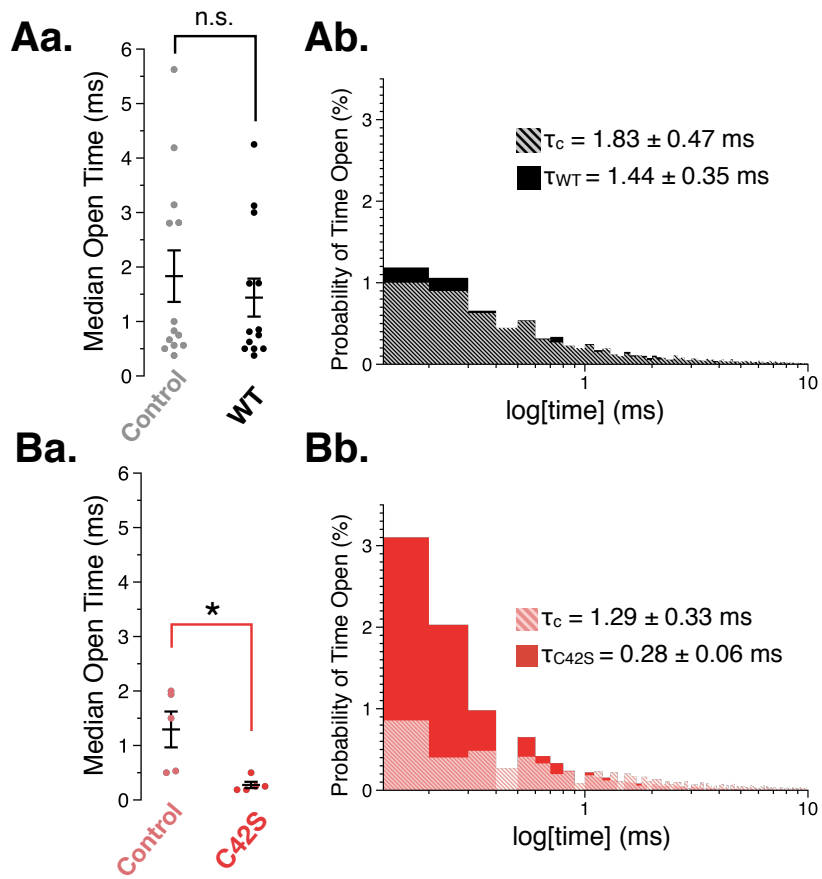

Figure S5

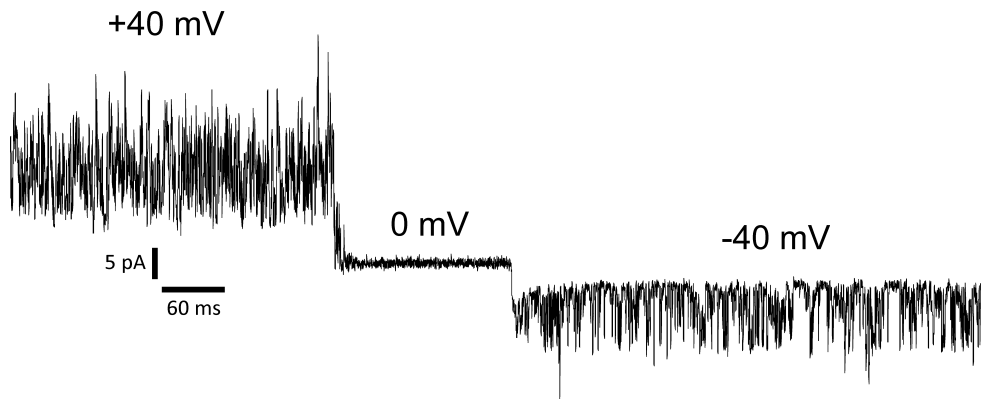

Supplement: supp_RA118.004363_138693_1_supp_196179_p888x2.pdf [file supp_RA118.004363_138693_1_supp_196179_p888x2.pdf]
